# Supplementary material
Source: PubMed Central journal article supplement (PMC4496604)
Supplement: IAI.00670-15_zii999091338so1.pdf [file IAI.00670-15_zii999091338so1.pdf]

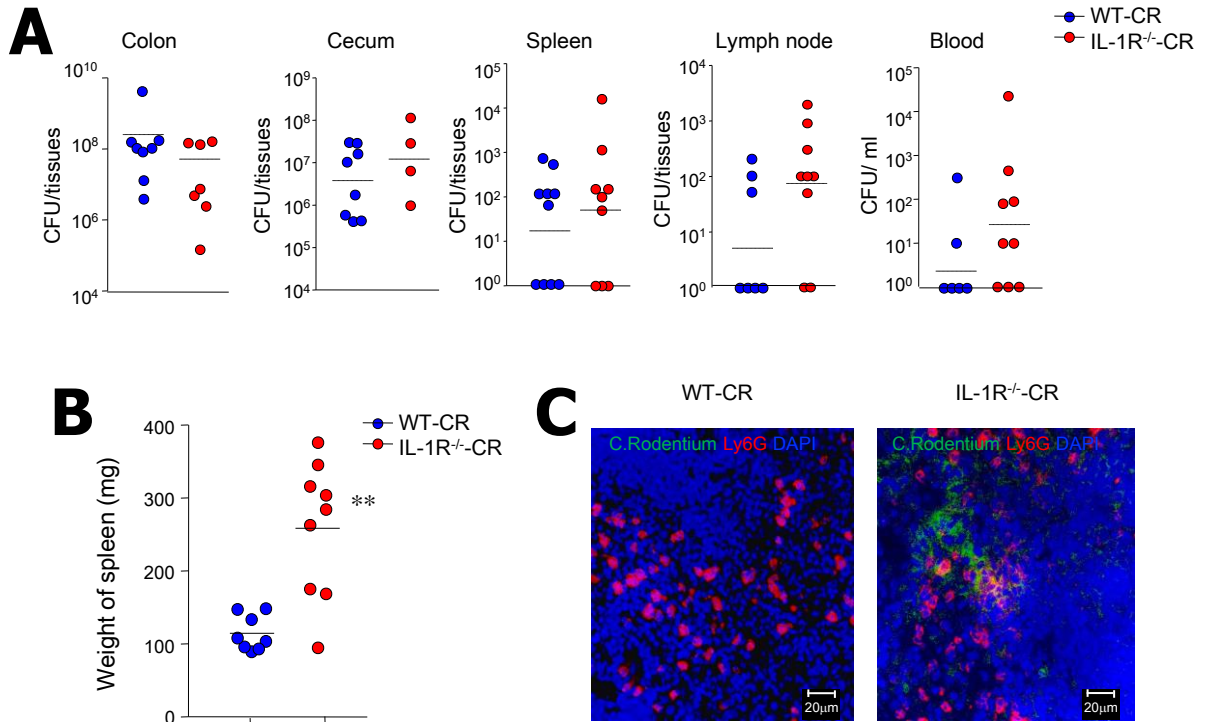

Supplementary Figure 1. IL-1R<sup>-/-</sup> mice show impaired host defense to *C. rodentium* 10 days after infection. (A) IL-1R<sup>-/-</sup> and WT mice were orally inoculated with *C. rodentium* (1 x 10<sup>9</sup> CFU). Numbers of *C. rodentium* in colon, cecum, spleen, mesenteric and iliac lymph nodes, and blood were assessed. (B) WT and IL-1R<sup>-/-</sup> mice were orally inoculated with GFP-expressing *C. rodentium* (1 x 10<sup>9</sup> CFU). Spleens were weighed and measured on day 10 after infection. (C) Confocal microscopy was also done in the spleen: *C. rodentium*-GFP (green), Ly6G (red), and DAPI (blue). Each dot represents an individual mouse. All data are representative of at least three experiments. \*\*P<0.01

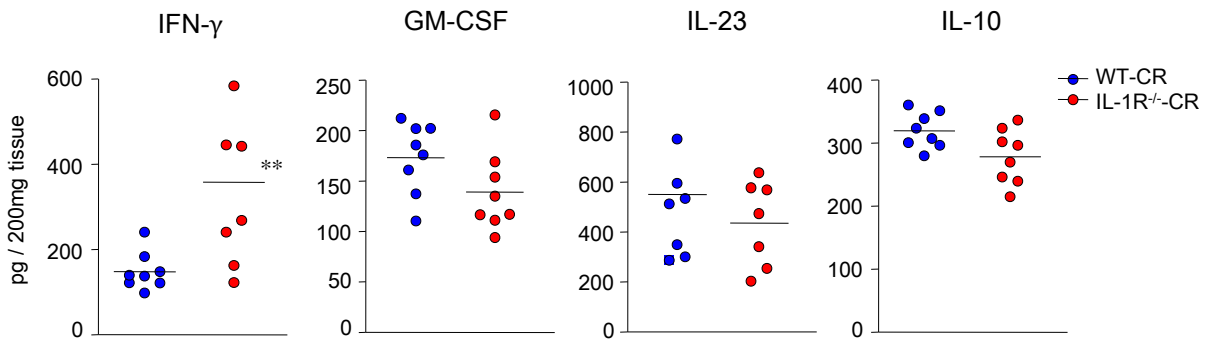

Supplementary Figure 2. IL-1R<sup>-/-</sup> mice show high levels of IFN-γ secretion on the colon in response to *C. rodentium* infection. Inflammatory cytokine levels in supernatant of colon homogenates of WT and IL-1R<sup>-/-</sup> mice days 10 after infection. Each dot represents an individual mouse. \*\*P<0.01.

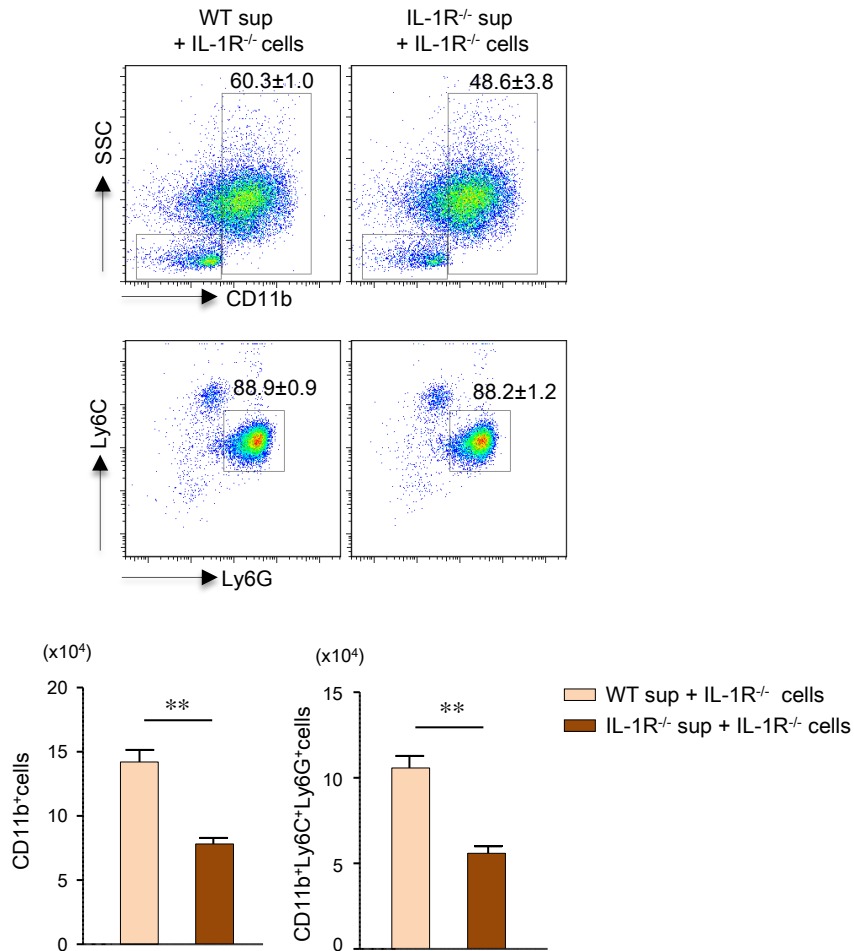

Supplementary Figure 3. Migration of IL-1R-deficient neutrophils in stromal cells from colon of WT and IL-1R<sup>-/-</sup> mice. Stromal cells isolated 3 days after infection were seeded into 24-well plates ( $2 \times 10^5$  cells/well). Culture supernatants were harvested 4 days later. Mononuclear cells isolated from bone marrow of IL-1R<sup>-/-</sup> mice were suspended in complete medium, and placed in the upper chamber of 5- $\mu$ m Transwell plates ( $10^6$  cells/well). Lower chamber contained medium alone or stromal cell-cultured supernatant. After incubation for 2 h, cells that had migrated were harvested from the lower chamber and stained for CD11b, Ly6C, and Ly6G antibodies. \*\* $P < 0.01$ .
